# Supplementary material for: Effects of Pulsed Electric Field Pretreatment on Black Tea Processing and Its Impact on Cold-Brewed Tea
Source: MDPI journal article supplement (doi:10.3390/foods13010164), 2024-01-03
Supplement: s1 [file s1]

## Processing of black tea

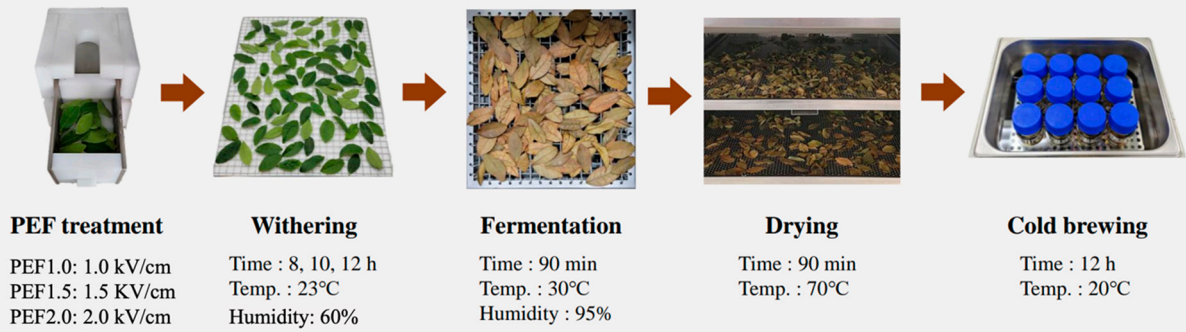

Figure S1. The process flow for the PEF treatment, withering, fermentation, drying and cold brewing with detailed conditions.
